# Supplementary material
Source: HighWire-hosted journal article supplement (https://cmaj.ca/highwire/filestream/59596/field_highwire_adjunct_files/2/150771-res-Appendix_11.pdf)
Supplement: 150771-res-Appendix_11.pdf [file 150771-res-Appendix_11.pdf]

**Appendix 11 (as supplied by the authors): Risk of All-Cause Death, Major Adverse Cardiac Events, and Hospitalization for Acute Kidney Injury and Hyperkalemia Among Patients Using ARBs and ACEIs After Excluding Prevalent Users**

|                                         | Adjusted <sup>†</sup>    |         |
|-----------------------------------------|--------------------------|---------|
|                                         | Hazard Ratio<br>(95% CI) | P Value |
| <b>Intention-to-treat analysis</b>      |                          |         |
| All-cause death                         | 0.97 (0.87-1.07)         | 0.5     |
| Major adverse cardiac events            | 0.88 (0.78-1.00)         | 0.06    |
| Hospitalization for acute kidney injury | 0.97 (0.83-1.12)         | 0.7     |
| Hospitalization for hyperkalemia        | 1.13 (0.91-1.41)         | 0.3     |
| <b>As-treated analysis</b>              |                          |         |
| All-cause death                         | 1.24 (0.91-1.69)         | 0.2     |
| Major adverse cardiac events            | 0.84 (0.68-1.04)         | 0.1     |
| Hospitalization for acute kidney injury | 1.19 (0.90-1.58)         | 0.2     |
| Hospitalization for hyperkalemia        | 1.10 (0.73-1.66)         | 0.7     |

<sup>†</sup> Adjusted for propensity score.

Abbreviations: CI, confidence interval; ARB, Angiotensin II receptor blockers; ACEI, angiotensin-converting-enzyme inhibitors.
